# Supplementary material for: Predicting chromosome 1p/19q codeletion by RNA expression profile: a comparison of current prediction models
Source: publisher site journal article supplement (doi:10.18632/aging.101795), 2019-02-02
Supplement: Supplementary file [file aging-v11i3-101795-supplementary-material-SD2.pdf]

## SUPPLEMENTARY TABLE

**Supplementary Table 1. Integrated analysis of methods for detecting 1p/19q status.**

| <b>Methods</b>          | <b>Cost</b> | <b>Time</b> | <b>Accuracy</b>                                 |
|-------------------------|-------------|-------------|-------------------------------------------------|
| Whole genome sequencing | ~\$2500     | ~1month     | 100%                                            |
| RNA sequencing          | ~\$200      | ~2weeks     | 97.8%                                           |
| FISH                    | ~\$340      | ~2weeks     | 1p36/1q21 and 19q13/19p13<br>Deletion Probe Kit |
